# Supplementary material for: The 3d–4f electron transition of the CoS2/CeO2 heterojunction for efficient oxygen evolution
Source: Royal Society of Chemistry journal article supplement (doi:10.1039/d4cc01680g), 2024-01-01
Supplement: d4cc01680g1.pdf [file d4cc01680g1.pdf]

## Supporting Information

The 3d-4f electron transition of CoS<sub>2</sub>/CeO<sub>2</sub> heterojunction for efficient oxygen evolution

Yaqin Chen,<sup>a#</sup> Yuchao Zhang,<sup>a#</sup> Hui Xue,<sup>\*a</sup> Jing Sun,<sup>a</sup> Niankun Guo,<sup>a</sup> Tianshan Song,<sup>a</sup>  
Jiawen Sun,<sup>a</sup> Yi-Ru Hao,<sup>a</sup> and Qin Wang<sup>\*a</sup>

<sup>a</sup> College of Chemistry and Chemical Engineering, Inner Mongolia University, Hohhot  
010021 (PR China)

Corresponding authors: E-mail: qinwang@imu.edu.cn (Q. Wang)

<sup>#</sup> These authors contributed equally to this work.

### 1. Material Synthesis

#### Chemicals

The cobalt nitrate (Co(NO<sub>3</sub>)<sub>2</sub>·6H<sub>2</sub>O, AR), cerium nitrate (Ce(NO<sub>3</sub>)<sub>3</sub>·6H<sub>2</sub>O, AR), urea (CO(NH<sub>2</sub>)<sub>2</sub>, AR), ammonium fluoride (NH<sub>4</sub>F, AR) and sulfur powder were purchased from Tianjin Fengchuan Chemical Reagent Factory. The Ni Foam was purchased from Taiyuan LZY Technology Co., Ltd. The potassium hydroxide (KOH, 95%) and ethanol (CH<sub>3</sub>CH<sub>2</sub>OH, 95%) were purchased from Aladdin. All the chemicals were used without being purified.

#### Synthesis of CeCo-precursor

Before the hydrothermal treatment, the nickel foam (NF) was sectioned into small

pieces measuring  $2 \times 3 \text{ cm}^2$  and subjected to a cleaning process involving 3 M HCl, acetone, ethanol, and deionized water for 15 minutes. A light pink solution was prepared by dissolving 1.0 mmol of  $\text{Co}(\text{NO}_3)_2 \cdot 6\text{H}_2\text{O}$ , 0.5 mmol of  $\text{Ce}(\text{NO}_3)_3 \cdot 6\text{H}_2\text{O}$ , 0.3 g of urea, and 0.18 g of  $\text{NH}_4\text{F}$  in 20 mL deionized water, followed by stirring at room temperature for 30 minutes. Subsequently, the solution was transferred into a Teflon-lined autoclave, and the treated NF into the above solution, heated at  $140 \text{ }^\circ\text{C}$  for 8 hours. After cooling to room temperature, the precursor was extracted and washed three times with deionized water and ethanol before being dried overnight at  $60 \text{ }^\circ\text{C}$ .

#### **Synthesis of $\text{Co}_3\text{O}_4/\text{CeO}_2$**

The CeCo-precursor was subjected to oxidation in an air atmosphere within a tube furnace, which was heated to  $350 \text{ }^\circ\text{C}$  and maintained for a duration of 2 hours, resulting in the production of the  $\text{Co}_3\text{O}_4/\text{CeO}_2$  catalyst.

#### **Synthesis of $\text{CoS}_2/\text{CeO}_2$**

The chemical vapor deposition method was used for vulcanization. Specifically,  $\text{Co}_3\text{O}_4/\text{CeO}_2$  was placed near the outlet end of the tube furnace, and sulfur powder was placed near the inlet end, and heated to  $350 \text{ }^\circ\text{C}$  under a nitrogen atmosphere for 2 hours. Subsequently, the  $\text{CoS}_2/\text{CeO}_2$  catalyst was successfully synthesized upon cooling to room temperature.

#### **Synthesis of $\text{CoS}_2$**

The synthesis of the  $\text{CoS}_2$  catalyst on NF was similar to that of the  $\text{CoS}_2/\text{CeO}_2$  catalyst, with the exception that  $\text{Ce}(\text{NO}_3)_3 \cdot 6\text{H}_2\text{O}$  was not added during the hydrothermal step.

#### **Synthesis of $\text{CeO}_2$**

The synthesis CeO<sub>2</sub> catalyst on NF was similar to that of the CoS<sub>2</sub>/CeO<sub>2</sub> catalyst, with the exception that Co(NO<sub>3</sub>)<sub>3</sub>·6H<sub>2</sub>O and NH<sub>4</sub>F were not added during the hydrothermal step.

## 2. Material Characterization

X-ray diffraction (XRD) profiles ( $2\theta$ , 5-80°) were acquired on a PuXi XD3 diffractometer with Cu K $\alpha$  ( $\lambda = 0.15406$  nm). X-ray photoelectron spectra (XPS) were corrected using the C 1s line at 284.8 eV and measured using an ESCA-LAB 250 X-ray electron spectrometer equipped with Al K $\alpha$  radiation. The scanning electron microscopy (SEM) images were performed on Field Emission Scanning Electron Microscopy (FESEM, JEOL JSM-7600F). Transmission electron microscopy (TEM) and high-resolution transmission electron microscopy (HRTEM) images were recorded on a JEM-2100F transmission electron microscope system. Electron paramagnetic resonance (EPR) tests were performed using the JES FA200 electron paramagnetic resonance spectrometer. The Raman spectra were analyzed by a Renishaw inVia Raman spectrometer with a 532 nm laser as excitation source.

## 3. Electrochemical Test

All electrochemical measurements were performed on a CHI760e (Shanghai, China) electrochemical workstation using a standard three-electrode system. The nickel foam with the catalyst was used as the working electrode (area of  $\sim 1 \times 0.5$  cm<sup>2</sup>), the saturated calomel electrode as the reference electrode, and the carbon rod as the counter electrode, respectively. The linear sweep voltammetry (LSV) curves were performed in the range of 0 to 1 V (vs. SCE) for OER and UOR in an alkaline solution at the scan

rate of  $2 \text{ mV s}^{-1}$ . The double-layer capacitance ( $C_{dl}$ ) of the catalysts at different scanning rates was measured by cyclic voltammetry (CV) in the non-Faraday region. Electrochemical impedance spectroscopy (EIS) was performed at 0.45 V and in alkaline solution. The potentiostatic test curves (i-t) were measured with a constant potential to investigate its stability. The Faraday efficiency is measured by the drainage method. The theoretical  $\text{O}_2$  precipitation is calculated by Faraday's law and I-t curve, and compared with the actual oxygen production produced in the test process. The diffuse reflection absorption curve is obtained by using a UV-VIS spectrometer (UV-3600i Plus), and the test band is 200-800 nm.

#### **4. DFT Methods**

We have employed the first principles<sup>1</sup> to perform all spin-polarization density functional theory (DFT) calculations within the generalized gradient approximation (GGA) using the Perdew-Burke-Ernzerhof (PBE) [3] formulation. The cut-off energy for the plane wave basis is set to 400 eV and a  $4 \times 4 \times 1$  K-point mesh is employed. The Hubbard-type U correction for the strong-correlation 3d and 4f electrons of Co and Ce are 3.4 and 2.3 eV, respectively (GGA+U). [4] Relativistic spin-orbit coupling (SOC) was included in the density of states calculations. All the structures were fully relaxed (atomic position) up to  $10^{-5} \text{ eV/\AA}$  force minimization and max force of  $0.01 \text{ eV/\AA}$ .

We have chosen the projected augmented wave (PAW) [5,6] potentials to describe the ionic cores and take valence electrons into account using a plane wave basis set with a kinetic energy cutoff of 520 eV. The GGA+U method was adopted in our calculations. The value of the effective Hubbard U was set as 4.814 eV for Ce Partial occupancies

of the Kohn–Sham orbitals were allowed using the Gaussian smearing method and a width of 0.05 eV. The electronic energy was considered self-consistent when the energy change was smaller than  $10^{-5}$  eV. A geometry optimization was considered convergent when the energy change was smaller than  $0.05 \text{ eV} \cdot \text{\AA}^{-1}$ . The Brillouin zone integration is performed using  $2 \times 2 \times 1$  Monkhorst-Pack k-point sampling for a structure. Finally, the adsorption energies ( $E_{\text{ads}}$ ) were calculated as  $E_{\text{ads}} = E_{\text{ad/sub}} - E_{\text{ad}} - E_{\text{sub}}$ , where  $E_{\text{ad/sub}}$ ,  $E_{\text{ad}}$ , and  $E_{\text{sub}}$  are the total energies of the optimized adsorbate/substrate system, the adsorbate in the structure, and the clean substrate, respectively. The free energy was calculated using the equation:

$$G = E_{\text{ads}} + \text{ZPE} - TS$$

where  $G$ ,  $E_{\text{ads}}$ , ZPE, and  $TS$  are the free energy, total energy from DFT calculations, zero-point energy, and entropic contributions, respectively, where  $T$  is set to 300 K. [7]

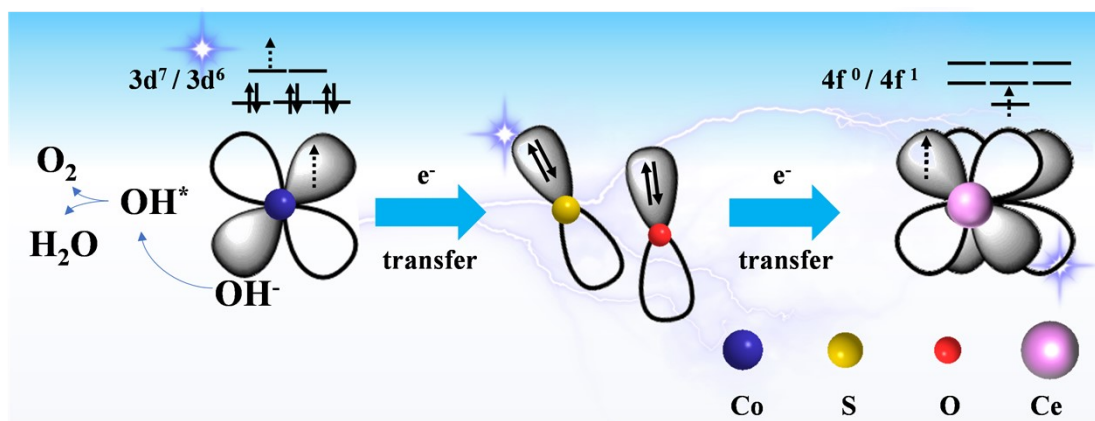

**Fig. S1** Prediction of interfacial charge transfer between  $\text{CoS}_2$  and  $\text{CeO}_2$  based on track coupling engineering.

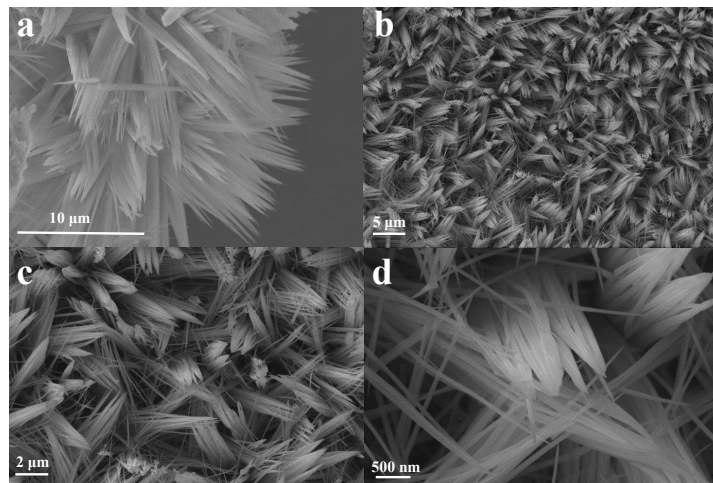

**Fig. S2** SEM images of the (a) CeCo-precursor and (b-d) Co<sub>3</sub>O<sub>4</sub>/CeO<sub>2</sub> catalyst.

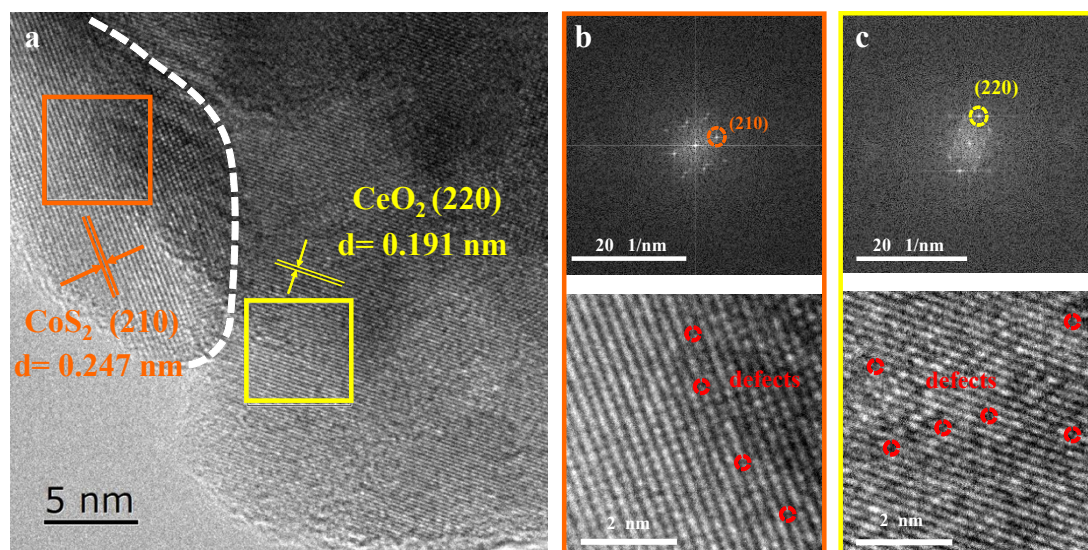

**Fig. S3** (a) HRTEM image of the  $\text{Co}_3\text{O}_4/\text{CeO}_2$  catalyst and (b, c) FFT and inverse FFT images corresponding to different color regions, respectively.



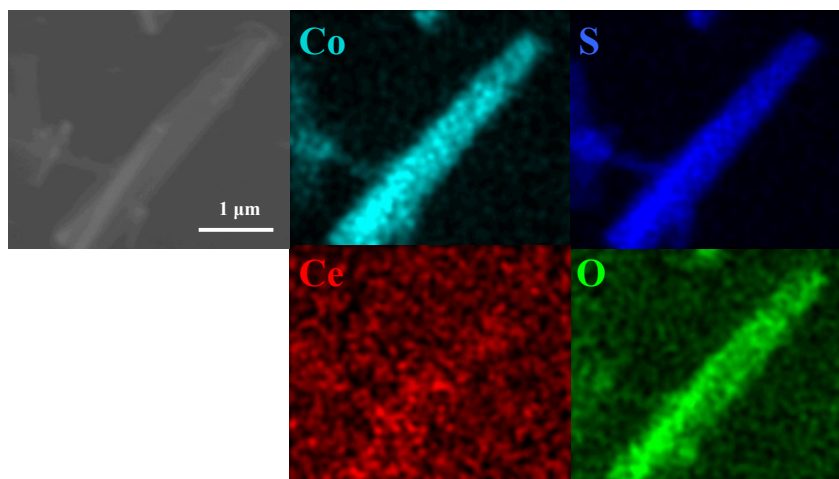

**Fig. S4** SEM-elemental mapping of CoS<sub>2</sub>/CeO<sub>2</sub> catalyst.

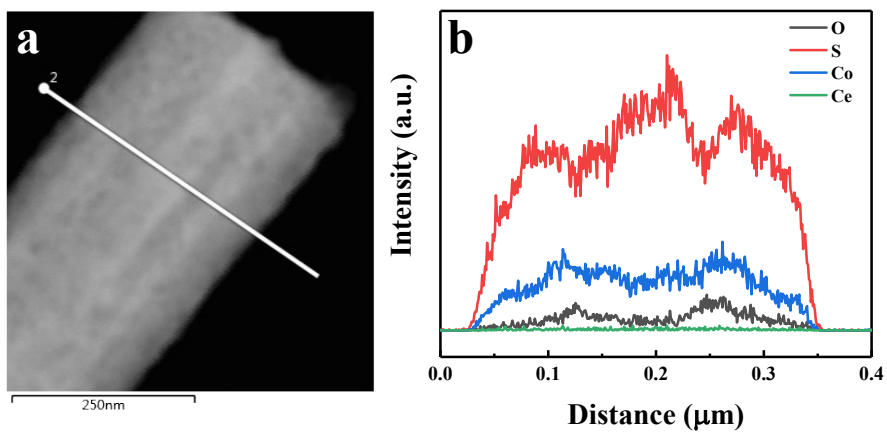

**Fig. S5** Line scanning profiles of the  $\text{CoS}_2/\text{CeO}_2$  catalyst.

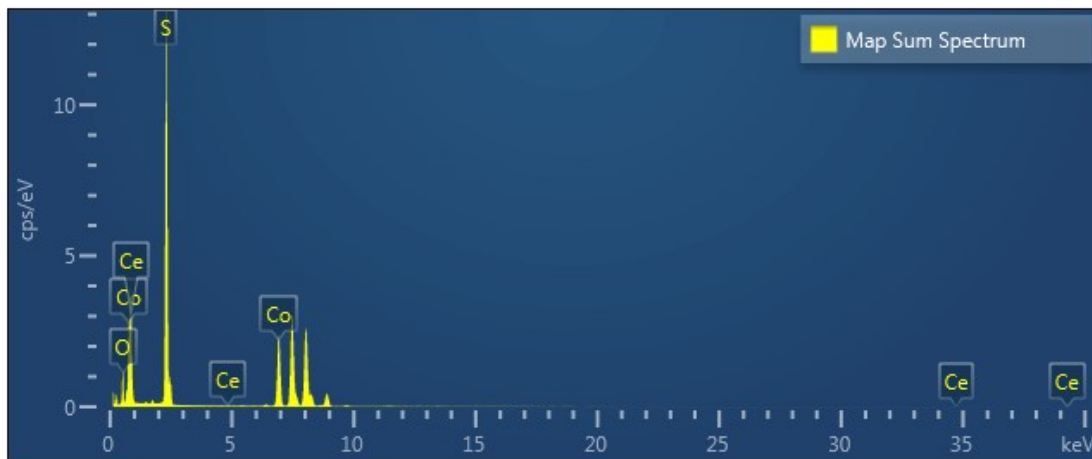

**Fig. S6** EDX spectra of the CoS<sub>2</sub>/CeO<sub>2</sub> catalysts.

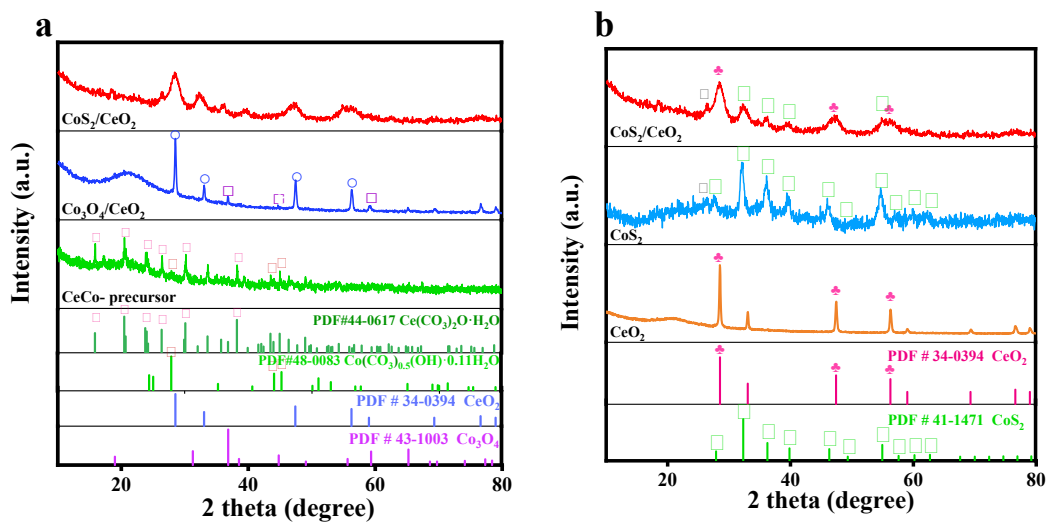

**Fig. S7** XRD patterns of (a) the CeCo-precursor,  $\text{Co}_3\text{O}_4/\text{CeO}_2$ , and  $\text{CoS}_2/\text{CeO}_2$  powder catalysts, (b) the  $\text{CeO}_2$ ,  $\text{CoS}_2$  and  $\text{CoS}_2/\text{CeO}_2$  powder catalysts.

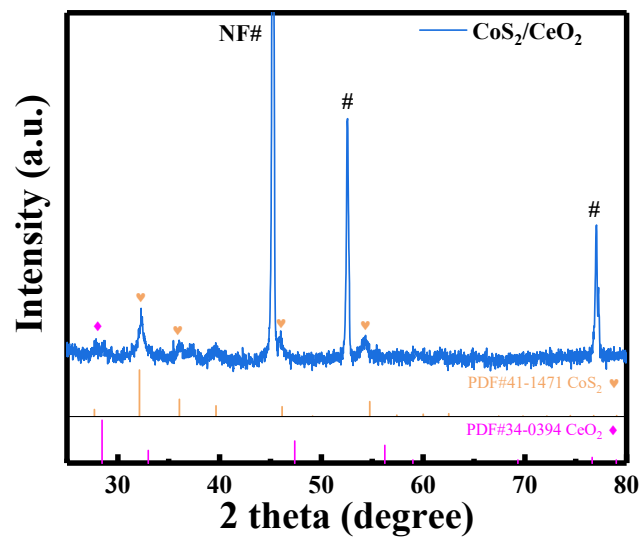

**Fig. S8** XRD pattern of CoS<sub>2</sub>/CeO<sub>2</sub> catalyst grown on nickel foam.

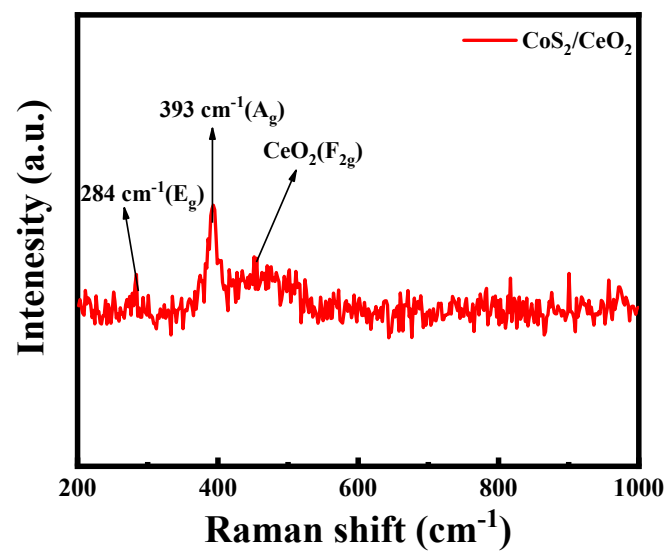

Fig. S9 Raman spectra of the CoS<sub>2</sub>/CeO<sub>2</sub> catalyst.

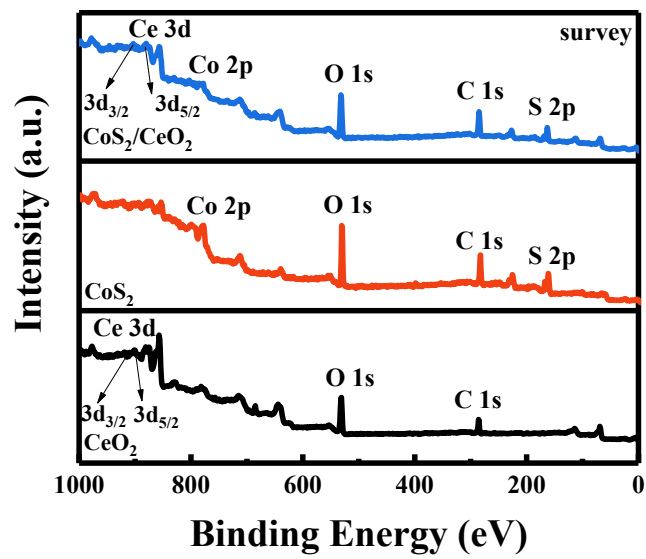

Fig. S10 XPS survey of  $\text{CeO}_2$ ,  $\text{CoS}_2$ , and  $\text{CoS}_2/\text{CeO}_2$  catalysts.

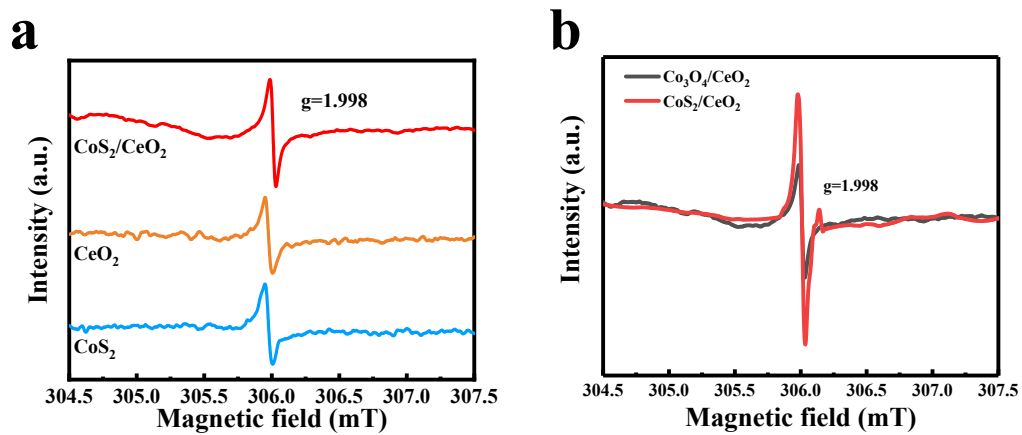

**Fig. S11** (a) The EPR spectra of CoS<sub>2</sub>, CeO<sub>2</sub> and CoS<sub>2</sub>/CeO<sub>2</sub> catalysts, and (b) The EPR spectra of Co<sub>3</sub>O<sub>4</sub>/CeO<sub>2</sub> and CoS<sub>2</sub>/CeO<sub>2</sub> catalysts.



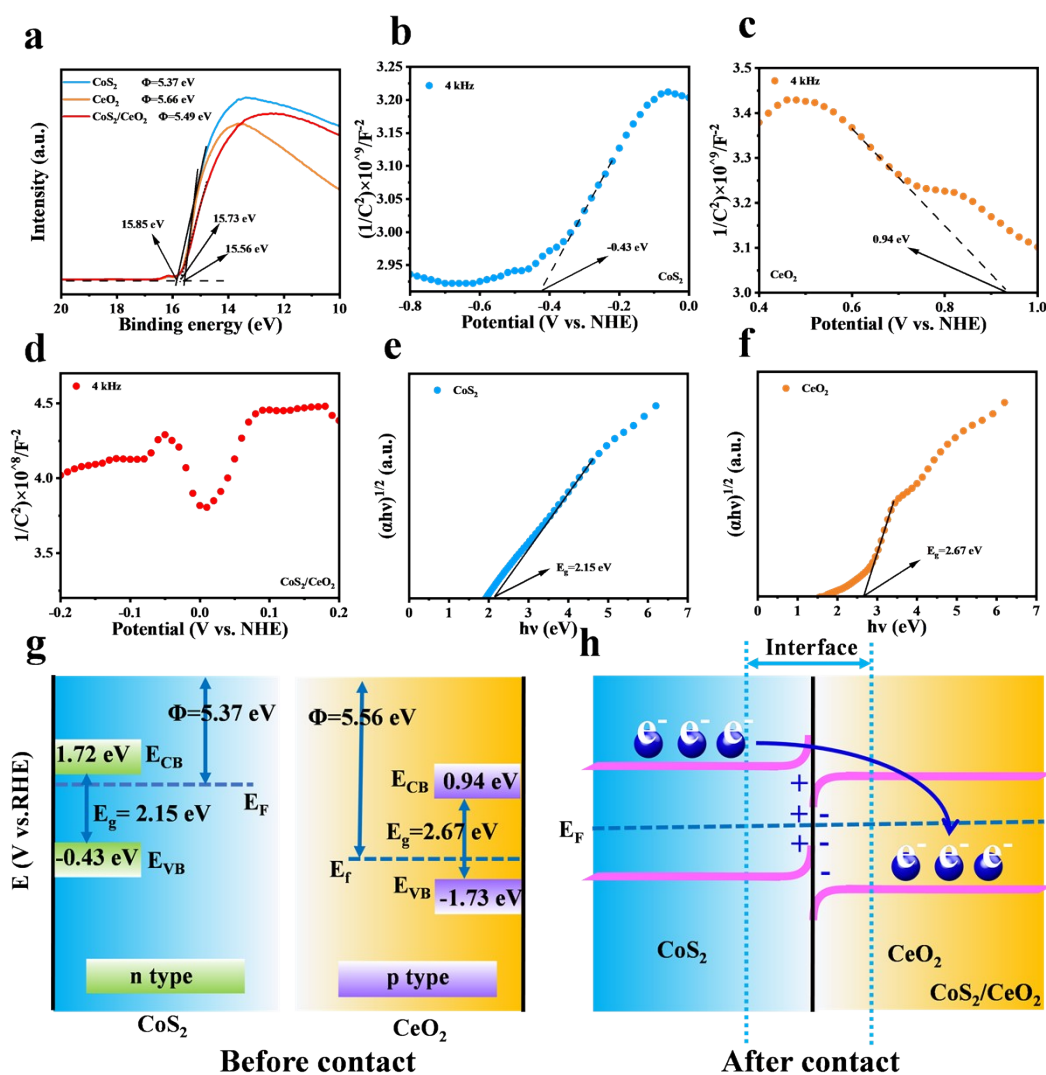

**Figure S12.** (a) UPS spectra of the CoS<sub>2</sub>/CeO<sub>2</sub>, CoS<sub>2</sub> and CeO<sub>2</sub> catalysts. The secondary electron cutoff is obtained. Mott-Schottky plots: (b) CoS<sub>2</sub>; (c) CeO<sub>2</sub>; (d) CoS<sub>2</sub>/CeO<sub>2</sub>. UV-VIS spectra test of (e) CoS<sub>2</sub> and (f) CeO<sub>2</sub>. (g) Energy band structure alignments of CoS<sub>2</sub> and CeO<sub>2</sub> (CB = conduction band, VB = valence band, E<sub>F</sub> = Fermi level, E<sub>g</sub> = band gap, and Φ = work function). (h) Schematic of interface electronic structure in CoS<sub>2</sub>/CeO<sub>2</sub>.

We investigated the electron transfer capability of the catalysts through the UPS test (Fig. S12a). The E<sub>cutoff</sub> of the CoS<sub>2</sub> and CeO<sub>2</sub> are 15.85 eV and 15.56 eV, respectively. And the work function (Φ) values are 5.37 eV and 5.56 eV (calculated by the formula  $\Phi = h\nu - E_{\text{Cutoff}} + E_{\text{F}}$ ). As can be seen from Mott-Schottky plots in Fig. S12b-d, the slope of CoS<sub>2</sub> is positive, indicating that it is an n-type semiconductor

( $E_{VB} = -0.43$  eV); on the contrary, the slope of  $CeO_2$  is negative, indicating that it is a p-type semiconductor with  $E_{CB} = 0.94$  eV; and the Mott-Schottky plots of  $CoS_2/CeO_2$  catalyst shows a standard p-n heterojunction semiconductor. Fig. S12e and S12f show the UV-Vis spectra of  $CoS_2$  and  $CeO_2$ , from which we can infer that the bandgaps  $E_g$  are 2.15 and 2.67 eV, respectively. In order to study the charge transfer between  $CoS_2$  and  $CeO_2$ , band maps before and after contact are provided (Fig. S12g and S12h). This proves that the Mott-Schottky barrier will be generated between the two phases. On the one hand, electrons will spontaneously transfer from  $CoS_2$  to  $CeO_2$  with a lower Fermi level; on the other hand, with the progress of electron migration,  $CeO_2$  will be negatively charged and the free electrons near the  $CoS_2$  interface will be depleted, and positively charged, thus forming an internal electric field to achieve electron redistribution until the Fermi levels of both sides reach equilibrium. Therefore, the heterogeneous interface formed by the  $CoS_2/CeO_2$  catalyst can effectively promote electron transport and enhance electrical conductivity.

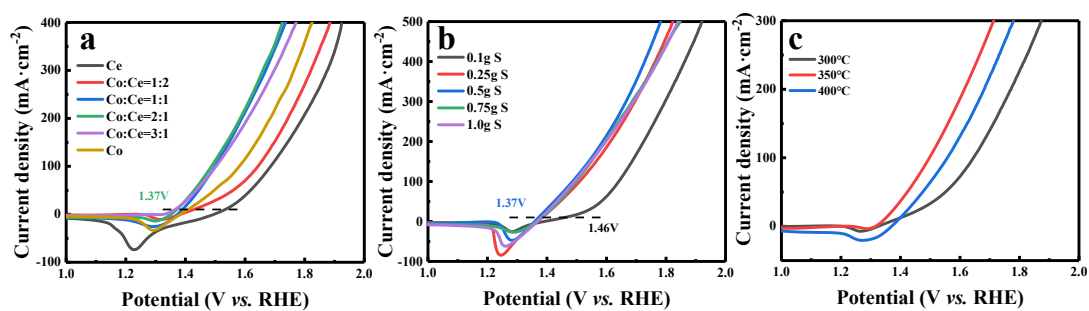

**Fig. S13** OER polarization curves of the different catalysts with (a) different molar ratios of Co and Ce, (b) different amounts of sublimed sulfur powder, and (c) different sulfuration temperatures.

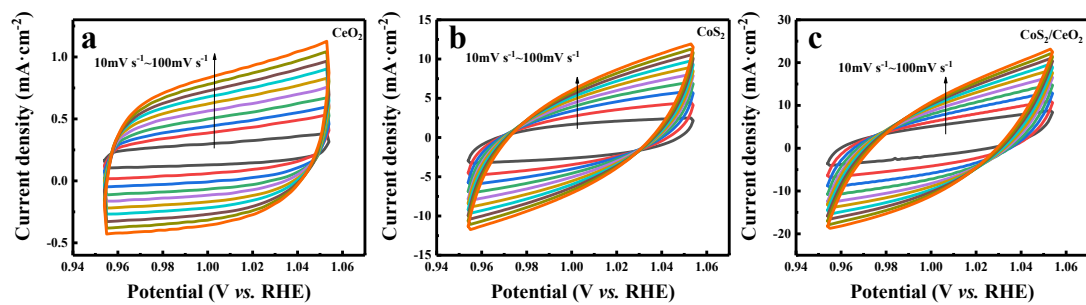

**Fig. S14** CV curves at scan rates from  $10 \text{ mV} \cdot \text{s}^{-1}$  to  $100 \text{ mV} \cdot \text{s}^{-1}$  for various catalysts: (a)  $\text{CeO}_2$ , (b)  $\text{CoS}_2$ , (c)  $\text{CoS}_2/\text{CeO}_2$  in 1.0 M KOH solution.

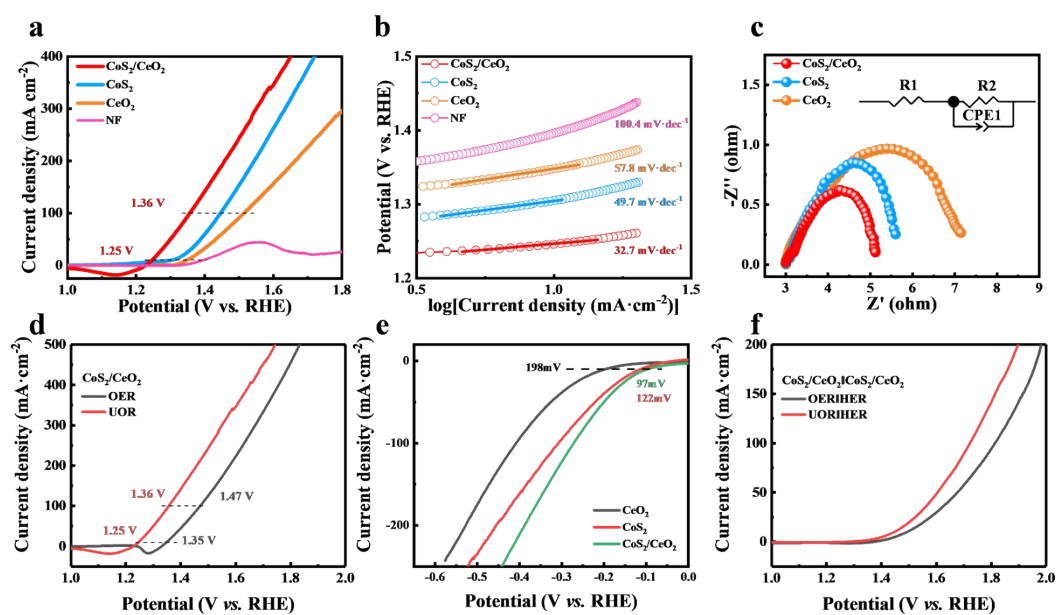

**Fig. S15** (a) UOR polarization curves in 1.0 M KOH and 0.5 M urea, (b) UOR Tafel slopes, (c) UOR Nyquist plots, (d) OER and UOR polarization curves, (e) HER polarization curves, and (f) overall water splitting and urea hybrid overall water splitting polarization curves.

The UOR performance of the  $\text{CoS}_2/\text{CeO}_2$  catalyst was evaluated in a solution containing 1.0 M KOH and 0.5 M urea in this work. The  $\text{CoS}_2/\text{CeO}_2$  catalyst demonstrates optimal UOR activity and superior UOR kinetics (Fig. S14a, S14b, and S14c, ESI<sup>†</sup>), as evidenced by ultralow potentials of 1.25 and 1.36 V at 10 and 100  $\text{mA}\cdot\text{cm}^{-2}$ , respectively. Meanwhile, the HER activity of the  $\text{CoS}_2/\text{CeO}_2$  catalyst was measured in a 1.0 M KOH solution. The HER overpotential for  $\text{CoS}_2/\text{CeO}_2$  catalyst is 97 mV at 10  $\text{mA}\cdot\text{cm}^{-2}$ , which is lower than that of  $\text{CoS}_2$  (122 mV) and  $\text{CeO}_2$  (198 mV) (Fig. S14e, ESI<sup>†</sup>). Moreover, the  $\text{CoS}_2/\text{CeO}_2$  catalyst required only 1.44 V potential in urea-assisted water electrolysis compared to water splitting (Fig. S14f, ESI<sup>†</sup>), indicating that the substitution of UOR for anode reaction significantly enhances the efficiency of water splitting.

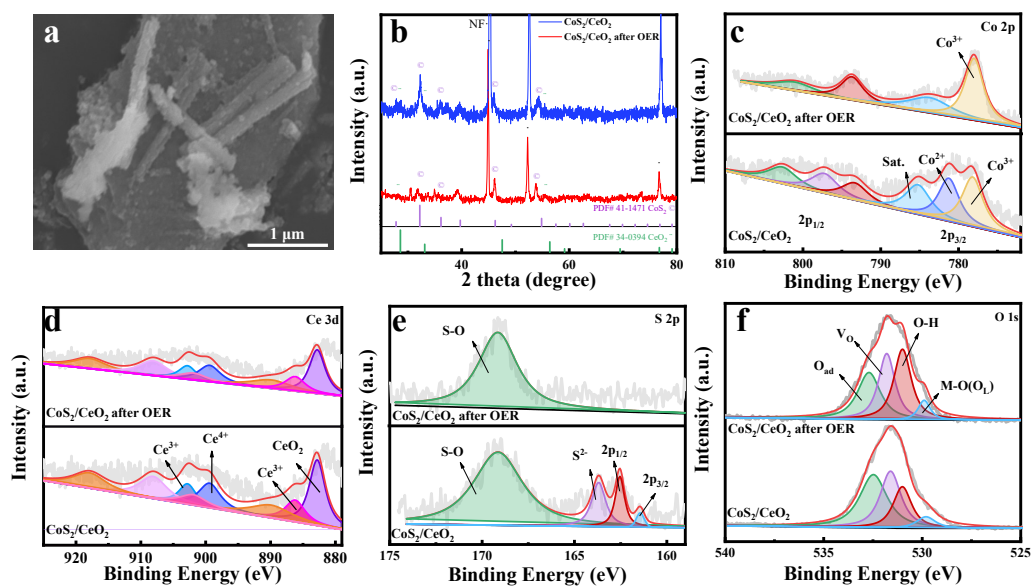

**Fig. S16** (a) SEM image, (b) XRD patterns of  $\text{CoS}_2/\text{CeO}_2$  after OER. XPS spectrum of  $\text{CoS}_2/\text{CeO}_2$  catalyst before and after OER: (c) Co 2p, (d) Ce  $3d_{5/2}$ , (e) S 2p, (f) O 1s.

The SEM image (in Fig. S16a) reveals that the rod-like morphology of the  $\text{CoS}_2/\text{CeO}_2$  catalyst remains largely unchanged after OER. In the XRD patterns (Fig. S16b), it is observed that no new diffraction peak is generated, indicating that the structure is intact after OER. The XPS spectrum after the OER process are presented in Fig. S16c-f. In Fig. S16c, the Co 2p XPS spectrum exhibits peaks at 793.8 and 778.0 eV, which correspond to the characteristic peaks of  $\text{Co}^{3+}$  ( $2p_{1/2}$  and  $2p_{3/2}$ ). Notably, there is a significant increase in the content of  $\text{Co}^{3+}$  after the OER process. The presence of  $\text{Ce}^{3+}$  and  $\text{Ce}^{4+}$  can also be identified in the spectrum of Ce  $3d_{5/2}$  (Fig. S16d). The S 2p XPS spectrum (Fig. S16e) reveals the presence of only the peak corresponding to the S-O bond, while the intensity of other peaks is significantly diminished compared to pre-reaction levels. This observation suggests that surface reconstruction of the catalyst took place during the OER process. In the XPS spectrum of O 1s (Fig. S16f), the presence of lattice oxygen ( $\text{O}_L$ , 529.8 eV), hydroxyl oxygen (-OH, 531.0 eV), oxygen vacancy ( $\text{V}_O$ , 531.8 eV) and adsorbed oxygen ( $\text{O}_a$ , 532.7 eV) can be observed after OER with a significant increase in the content of hydroxyl oxygen. [8]

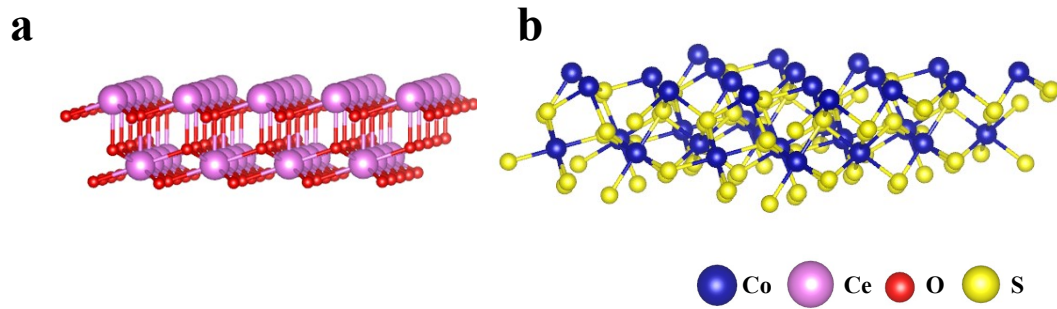

**Fig. S17** The atomic models of (a)  $\text{CeO}_2$ , (b)  $\text{CoS}_2$ .

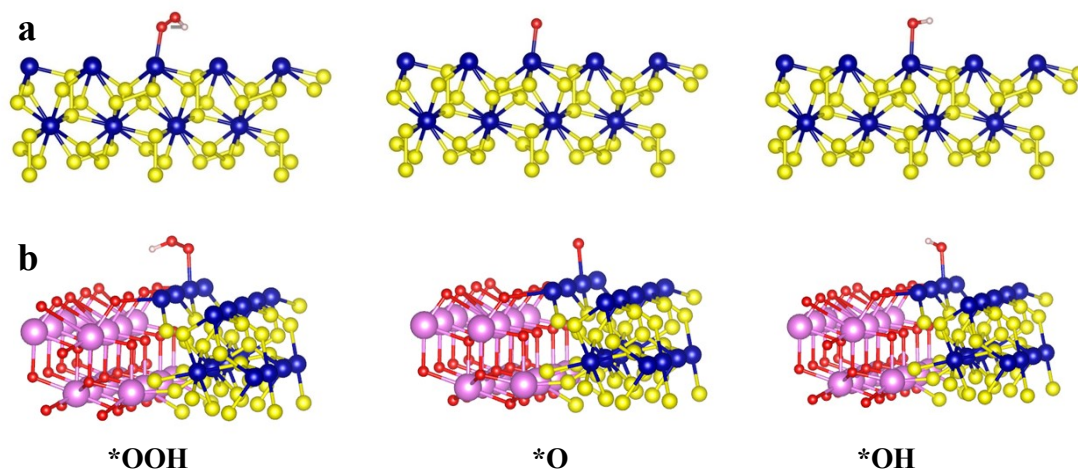

**Fig. S18** The intermediate state ( $*\text{OOH}$ ,  $*\text{O}$ ,  $*\text{OH}$ ) of the OER process is constructed on the structure of (a)  $\text{CoS}_2$ , and (b)  $\text{CoS}_2/\text{CeO}_2$ .



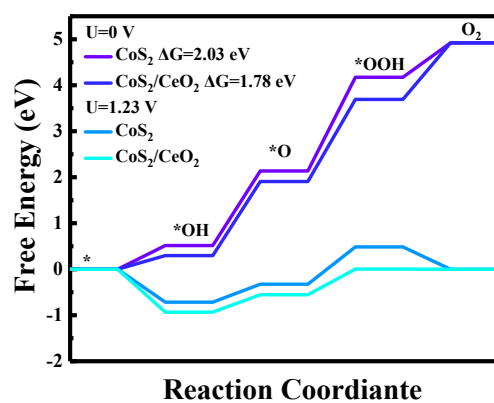

**Fig. S19** OER Gibbs free energy distribution of CoS<sub>2</sub> and CoS<sub>2</sub>/CeO<sub>2</sub> catalysts at 0 V and 1.23 V.

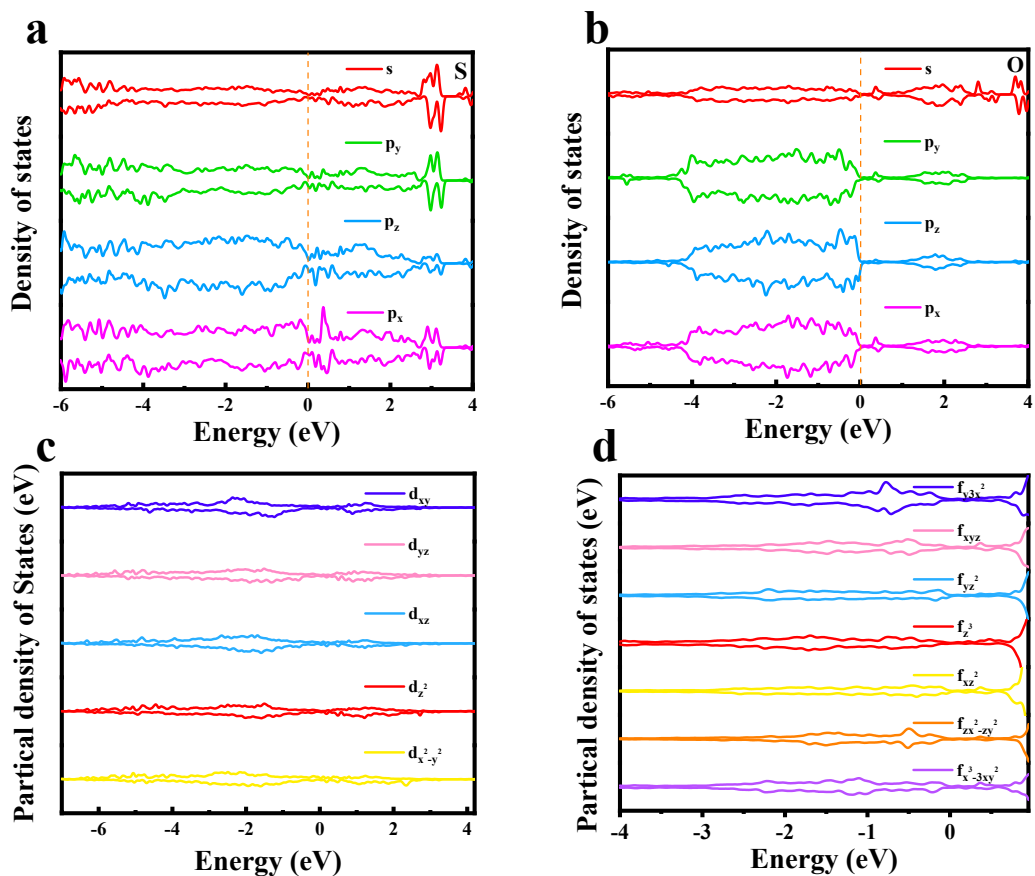

**Fig. S20** The PDOS of (a) degenerate S-s,p states, (b) degenerate O-s,p states, (c) degenerate Co-d states and (d) degenerate Ce-f states for CoS<sub>2</sub>/CeO<sub>2</sub>.

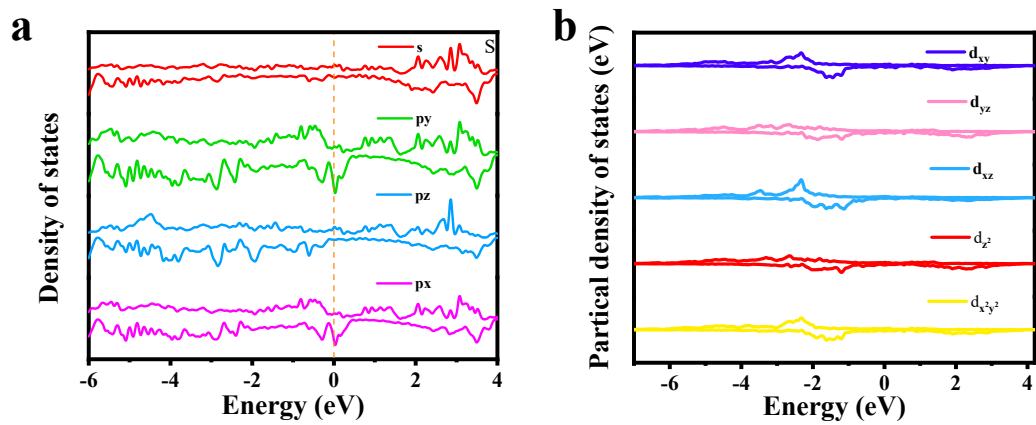

**Fig. S21** The PDOS of (a) degenerate S-s,p states,(b) degenerate Co-d states for CoS<sub>2</sub>.

**Table S1.** The surface elements content from XPS.

The carbon element located in 284.79 eV is used for calibration.

| Name  | Peak BE (eV) | Height CPS | FWHM (eV) | Area (P) CPS (eV) | Atomic % |
|-------|--------------|------------|-----------|-------------------|----------|
| Co 2p | 779.1        | 846.86     | 3.4       | 11817.48          | 7.14     |
| Ce 3d | 881.79       | 653.46     | 0.88      | 10500.57          | 1.98     |
| C 1s  | 284.79       | 4342.51    | 1.87      | 9832.66           | -        |
| O 1s  | 531.73       | 6025.89    | 2.55      | 17385.86          | 60.25    |
| S 2p  | 162.22       | 3157.08    | 0.72      | 6332.67           | 30.63    |

**Table S2.** Comparison of OER catalysts performance in this work and recently reported in alkaline medium.

| Catalyst                                                                     | Electrolyte | Substrate      | Overpotential<br>(mV) | Reference                                     |
|------------------------------------------------------------------------------|-------------|----------------|-----------------------|-----------------------------------------------|
| CoS <sub>2</sub> /CeO <sub>2</sub>                                           | 1.0 M KOH   | Nickel Foam    | 142                   | This work                                     |
| Ce-m-Ni(OH) <sub>2</sub> @NiSe <sub>2</sub>                                  | 1.0 M KOH   | Nickel Foam    | 158                   | Adv. Energy Mater., 2021,11, 2101266          |
| Ce-doped FeNi LDH<br>CFN@VSB-5                                               | 1.0 M KOH   | Nickel Foam    | 185                   | ACS Appl. Energy Mater., 2021, 4, 12836-12847 |
| Ni-Co-Fe-P                                                                   | 1.0 M KOH   | Nickel Foam    | 187                   | Appl. Catal. B: Environ., 2022, 310, 121353   |
| N, Ce-co-doped CoS <sub>2</sub>                                              | 1.0 M KOH   | Nickel Foam    | 190                   | J. Mater. Chem. A, 2020, 8, 22694-22702       |
| Fe-Co <sub>3</sub> O <sub>4</sub> HNs                                        | 1.0 M KOH   | Nickel Foam    | 204                   | Nano Energy, 2018, 54, 238-250                |
| N-CoS <sub>2</sub>                                                           | 1.0 M KOH   | Graphene       | 205                   | Appl. Catal. B: Environ., 2020, 268, 118449   |
| CoMnP/Ni <sub>2</sub> P                                                      | 1.0 M KOH   | Nickel Foam    | 209                   | J. Mater. Chem. A, 2021, 9, 22129-22139       |
| CoVFeN                                                                       | 1.0 M KOH   | Nickel Foam    | 212                   | Adv. Energy Mater., 2020, 10, 2002464         |
| CeO <sub>2</sub> @Co <sub>2</sub> N                                          | 1.0 M KOH   | Nickel Foam    | 219                   | Adv. Mater. Interfaces, 2021, 8, 2100041      |
| CoNiMoO <sub>4</sub> -21/CuO <sub>x</sub>                                    | 1.0 M KOH   | Copper Foam    | 221                   | Adv. Energy Mater.,2021, 11, 2102361          |
| Fe-Co MOF                                                                    | 1.0 M KOH   | Nickel Foam    | 224                   | J. Mater. Chem. A, 2021, 9, 13271-13278       |
| FeCoP                                                                        | 1.0 M KOH   | Nickel Foam    | 227                   | J. Mater. Chem. A, 2021, 9, 24677-24685       |
| Cu@CeO <sub>2</sub> @NFC-0.25                                                | 1.0 M KOH   | Copper Foam    | 230                   | Adv. Funct. Mater., 2020, 30, 1908367         |
| CoNi/CoFe <sub>2</sub> O <sub>4</sub>                                        | 1.0 M KOH   | Nickel Foam    | 230                   | J. Mater. Chem. A, 2018, 6, 19221-19230       |
| Ce-CoS <sub>2</sub>                                                          | 1.0 M KOH   | Titanium Plate | 233                   | J. Mater. Chem. A, 2019, 7, 17775-17781       |
| Co <sub>4</sub> N-CeO <sub>2</sub>                                           | 1.0 M KOH   | Graphite Plate | 239                   | Adv. Funct. Mater., 2020, 30, 1910596         |
| CoS <sub>2</sub> @NGC                                                        | 1.0 M KOH   | Nickel Foam    | 243                   | J. Mater. Chem. A, 2020, 8, 6795-6803         |
| NiYCe-MOF                                                                    | 1.0 M KOH   | Nickel Foam    | 245                   | Nano Lett., 2022, 22, 7238-7245               |
| S <sub>4.06</sub> -NiCoVO <sub>x</sub>                                       | 1.0 M KOH   | Nickel Foam    | 248                   | Nanoscale, 2021, 13, 17022-17027              |
| Er-doped CoP                                                                 | 1.0 M KOH   | Carbon Cloth   | 256                   | J. Mater. Chem. A, 2019, 7, 5769-5778         |
| S-CoTe                                                                       | 1.0 M KOH   | Carbon Cloth   | 257                   | Small, 2021, 17, 2102027                      |
| (Ni <sub>2</sub> Co <sub>1</sub> ) <sub>0.925</sub> Fe <sub>0.075</sub> -MOF | 1.0 M KOH   | Nickel Foam    | 257                   | Adv. Mater.,2019, 31, 1901139                 |

|                                                    |           |                    |     |                                                     |
|----------------------------------------------------|-----------|--------------------|-----|-----------------------------------------------------|
| Co/Ni (BDC) <sub>2</sub> TED                       | 1.0 M KOH | Copper Foil        | 260 | J. Mater. Chem. A, 2019, 7, 18519-18528             |
| CeO <sub>2</sub> -NiCoP <sub>x</sub>               | 1.0 M KOH | Nickel-cobalt Foam | 260 | Appl. Catal. B: Environ., 2022, 316, 121678         |
| Co-MoS <sub>2</sub> /BCCF-21                       | 1.0 M KOH | Pellicles          | 260 | Adv. Mater., 2018, 30, 1801450                      |
| Co <sub>1-x</sub> S/Co (OH)F                       | 1.0 M KOH | Carbon Cloth       | 269 | ACS Nano, 2022, 16, 15460-15470                     |
| CeO <sub>x</sub> /NiCo <sub>2</sub> S <sub>4</sub> | 1.0 M KOH | Carbon Cloth       | 270 | ACS Appl. Mater. Interfaces., 2019, 11, 39841-39847 |
| Fe-doped CoS <sub>2</sub>                          | 1.0 M KOH | Carbon Cloth       | 304 | Chem. Commun., 2019, 55, 2469-2472                  |
| CoS <sub>2</sub> /Cu <sub>2</sub> S                | 1.0 M KOH | Nickel Foam        | 348 | Appl. Catal. B: Environ., 2022, 303, 120849         |

## Reference

- 1 G. Kresse, J. Furthmüller, *Comput. Mater. Sci.*, 1996, 6, 15-50.
- 2 G. Kresse, J. Furthmüller, *Phys. Rev. B*, 1996, 54, 11169-11186.
- 3 J. P. Perdew, K. Burke, M. Ernzerhof, *Phys. Rev. Lett.*, 1996, 77, 3865-3868.
- 4 Fei Z, Cococcioni M, Marianetti C A, et al, *Phys. Rev. B*, 2004, 70, 235121.
- 5 G. Kresse, D. Joubert, *Phys. Rev. B*, 1999, 59, 1758-1775.
- 6 P. E Blöchl, *Phys. Rev. B*, 1994, 50, 17953-17979.
- 7 V. Wang, N. Xu, J.C. Liu, et al, *Comp. Phys. Commun.*, 2021, 267, 108033.
- 8 Y. Chen, J. Wang, Z. Yu, et al, *Appl. Catal. B: Environ.*, 2022, 307, 121151.
